# Supplementary material for: Light-induced changes in the suprachiasmatic nucleus transcriptome regulated by the ERK/MAPK pathway
Source: PLoS One. 2021 Jun 30;16(6):e0249430. doi: 10.1371/journal.pone.0249430 (PMC8244859; doi:10.1371/journal.pone.0249430)
Supplement: S8 Table — (XLSX) [file pone.0249430.s008.xlsx]

## Sheet: Sheet1
Gene Symbol	Locus type	Treatment	Time	Expression	Log2FC	adj.P.Val
Cd59a	Multiple_Complex	U0126	ZT4	7.82755	0.744907	0.0361284
Dusp4	Coding	U0126	ZT4	6.48682	-0.781703	0.0361284
Spry2	Coding	U0126	ZT4	6.5157	-0.595104	0.0361284
Spry4	Coding	U0126	ZT4	6.68243	-0.712743	0.0361284
